# Supplementary figures and images for: Population genomics reveals historical and ongoing recombination in the Fusarium oxysporum species complex
Source: PubMed Central journal article supplement — Stud Mycol. 2021 Dec 17;99:100132. doi: 10.1016/j.simyco.2021.100132 (PMC8693468; doi:10.1016/j.simyco.2021.100132), 2021-12-17

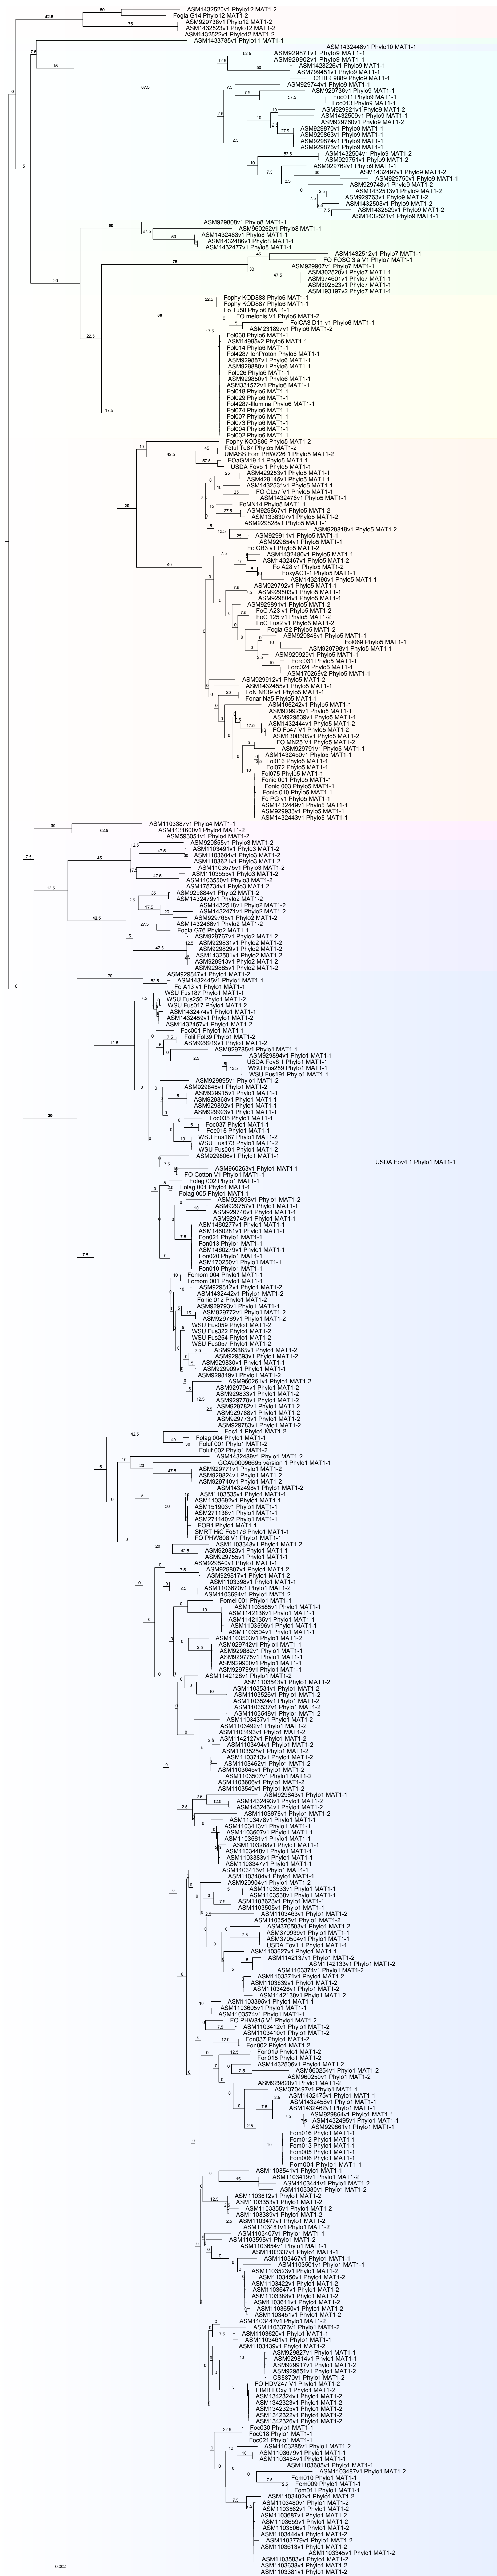

Supplement: mmc3.pdf [file mmc3.pdf]
